# Supplementary material for: Both T cell priming in lymph node and CXCR3-dependent migration are the key events for predicting the response of atezolizumab
Source: PubMed Central journal article supplement (PMC8260627; doi:10.1038/s41598-021-93113-y), 2021-07-06
Supplement: 41598_2021_93113_MOESM1_ESM.pdf [file 41598_2021_93113_MOESM1_ESM.pdf]

Research Articles:

Title:

**Importance of lymph nodes as a site of action of anti-PD-L1 antibodies, leading to identification of novel predictive biomarkers beyond PD-L1 expression score**

**Authors:**

Toshiki Iwai<sup>1</sup>, Masamichi Sugimoto<sup>1</sup>, Namrata S. Patil<sup>2</sup>, Daniel Bower<sup>2</sup>, Miho Suzuki<sup>1</sup>,

Chie Kato<sup>3</sup>, Keigo Yorozu<sup>1</sup>, Mitsue Kurasawa<sup>1</sup>, David S. Shames<sup>2</sup>, and Osamu Kondoh<sup>1</sup>

## Supplementary Data

Supplemental Fig.

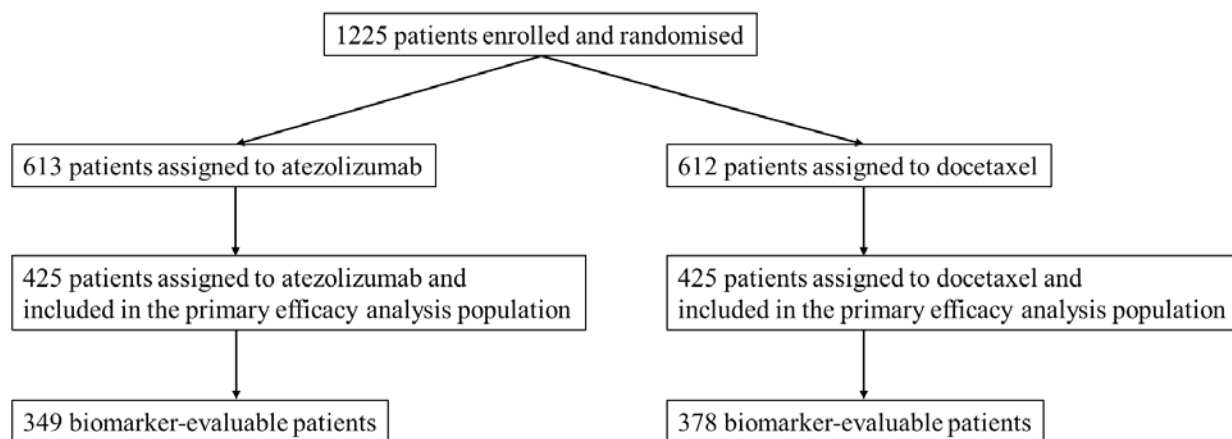

Supplemental Figure. CONSORT (Consolidated Standards of Reporting Trials) diagram for biomarker analysis from the OAK trial of atezolizumab in patients with previously treated, locally advanced, or metastatic NSCLC

**Table S1.** Antitumor activity of anti-PD-L1 mAb in the murine syngeneic tumor models

| Cell line   | TGI (%) | Response    |
|-------------|---------|-------------|
| Hepa 1-6    | 119     |             |
| Colon 38    | 90      |             |
| EMT6        | 87      | Sensitive   |
| MH134-TC    | 80      | $P < 0.05$  |
| MBT2        | 58      |             |
| FM3A        | 57      |             |
| OV2944-HM-1 | —       |             |
| Renca       | —       |             |
| MethA       | —       |             |
| EL4         | —       |             |
| KLN 205     | —       |             |
| B16F1       | —       | Insensitive |
| B16F10      | —       | $P > 0.05$  |
| LLC1        | —       |             |
| 4T1         | —       |             |
| CMT64       | —       |             |
| CMT64-OVA   | —       |             |

TGI, tumor growth inhibition

**Table S2.** Cell lines and culture conditions

| Cell lines  | Suppliers             | Culture conditions                                                                                             |
|-------------|-----------------------|----------------------------------------------------------------------------------------------------------------|
| Hepa 1-6    | ATCC                  | D-MEM with 10% FBS                                                                                             |
| Colon 38    | JFCR                  | RPMI-1640 with 10% FBS                                                                                         |
| EMT6        | ATCC                  | Waymouth MB 752/1 with 15% FBS                                                                                 |
| MH134-TC    | IDAC                  | RPMI-1640 with 10% FBS                                                                                         |
| MBT2        | JCRB Cell Bank        | E-MEM with 10% FBS                                                                                             |
| FM3A        | RIKEN BRC             | RPMI-1640 with 10% Newborn Calf Serum                                                                          |
| OV2944-HM-1 | RIKEN BRC             | $\alpha$ -MEM with 10% FBS                                                                                     |
| Renca       | ATCC                  | RPMI-1640 with 10% FBS, 0.25% D-glucose, 0.1 mM NEAA, 10 mM HEPES, 2 mM L-glutamine, and 1 mM sodium pyruvate  |
| MethA       | JFCR                  | Ascites forms of MethA were propagated intraperitoneally in BALB/c mice                                        |
| EL4         | ATCC                  | RPMI-1640 with 10% FBS, 2.5 g/L D-glucose, 1 mM sodium pyruvate, 10 mM HEPES, and 50 $\mu$ M 2-mercaptoethanol |
| KLN 205     | ATCC                  | E-MEM with 10% FBS, 1 mM sodium pyruvate, 0.1 mM NEAA, and 1.5 g/L sodium bicarbonate                          |
| B16F1       | ATCC                  | D-MEM with 10% FBS                                                                                             |
| B16F10      | IDAC                  | RPMI-1640 with 10% FBS                                                                                         |
| LLC1        | ATCC                  | D-MEM with 10% FBS                                                                                             |
| 4T1         | ATCC                  | RPMI-1640 with 10% FBS, 10 mM HEPES, 1 mM sodium pyruvate, and 0.45% D-glucose                                 |
| CMT64       | Public Health England | D-MEM with 10% FBS                                                                                             |
| CMT64-OVA   | —                     | D-MEM with 10% FBS and 500 $\mu$ g/mL G418                                                                     |

ATCC, American Type Culture Collection

JFCR, Japanese Foundation for Cancer Research

IDAC, Institute of Development, Aging and Cancer, Tohoku University

RIKEN BRC, RIKEN BioResource Research Center
